# Supplementary material for: Test–retest reliability of the EQ-5D-5L and the reworded QOLIBRI-OS in the general population of Italy, the Netherlands, and the United Kingdom
Source: Qual Life Res. 2021 Jun 1;30(10):2961–71. doi: 10.1007/s11136-021-02893-3 (PMC8481194; doi:10.1007/s11136-021-02893-3)
Supplement: Supplementary file 1 — Supplementary material 1 (DOCX 54 kb) [file 11136_2021_2893_MOESM1_ESM.docx]

## Title: Test-retest reliability of the EQ-5D-5L and the QOLIBRI-OS in the general population of Italy, the Netherlands and the United Kingdom

## Journal: Quality of Life Research

## Authors: Di Long1, Suzanne Polinder1, Gouke J. Bonsel1,2, Juanita A. Haagsma1

Erasmus MC, University Medical Center Rotterdam, Department of Public Health, Rotterdam, the Netherlands.

EuroQol Group Executive Office, Rotterdam, The Netherlands.

***Corresponding author**

D. Long

Erasmus MC, University Medical Center Rotterdam, Department of Public Health

P.O. Box 2040, 3000 CA Rotterdam

The Netherlands

Tel. 0031 1070 38914

Email: d.long@erasmusmc.nl

# Supplementary file 1.

We compared the distribution of EQ-5D-5L and QOLIBRI-OS of the respondents who filled out their basic information differently between T1 and T2 and those who didn’t. The distribution at T1 and T2 and showed in table 1-2. The results showed no significant between the two groups at both T1 and T2 in most dimensions(items). Only EQ VAS at T2 showed significant difference in distribution(p<0.05). Based on these results, we did not the respondents with errors from our analyses.

Table 1. Distribution of the EQ-5D-5L, QOLIBRI-OS between the respondents with errors and with no errors in the baseline information at T1.

|  |  |  | With errors  (N=93) | Without errors  (N=1078) | P value |
| --- | --- | --- | --- | --- | --- |
| EQ-5D-5L | | |  |  |  |
|  | Mobility | |  |  | 0.840 |
|  |  | No problems | 77 (82.8%) | 904 (83.9%) |  |
|  |  | Slight problems | 12 (12.9%) | 119 (11.0%) |  |
|  |  | Moderate problems | 4 (4.3%) | 37 (3.4%) |  |
|  |  | Severe problems | 0 (0.0%) | 14 (1.3%) |  |
|  |  | Unable | 0 (0.0%) | 4 (0.4%) |  |
|  | Self-care | |  |  | 0.884 |
|  |  | No problems | 88 (94.6%) | 1017 (94.3%) |  |
|  |  | Slight problems | 4 (4.3%) | 34 (3.2%) |  |
|  |  | Moderate problems | 1 (1.1%) | 18 (1.7%) |  |
|  |  | Severe problems | 0 (0.0%) | 5 (0.5%) |  |
|  |  | Unable | 0 (0.0%) | 4 (0.4%) |  |
|  | Usual activities | |  |  | 0.490 |
|  |  | No problems | 78 (83.9%) | 880 (81.6%) |  |
|  |  | Slight problems | 12 (12.9%) | 119 (11.0%) |  |
|  |  | Moderate problems | 3 (3.2%) | 58 (5.4%) |  |
|  |  | Severe problems | 0 (0.0%) | 17 (1.6%) |  |
|  |  | Unable | 0 (0.0%) | 4 (0.4%) |  |
|  | Pain/discomfort | |  |  | 0.978 |
|  |  | No problems | 54 (58.1%) | 637 (59.1%) |  |
|  |  | Slight problems | 29 (31.2%) | 303 (28.1%) |  |
|  |  | Moderate problems | 9 (9.7%) | 104 (9.6%) |  |
|  |  | Severe problems | 1 (1.1%) | 25 (2.3%) |  |
|  |  | Unable | 0 (0.0%) | 9 (0.8%) |  |
|  | Anxiety/depression | |  |  | 0.151 |
|  |  | No problems | 65 (69.9%) | 682 (63.3%) |  |
|  |  | Slight problems | 19 (20.4%) | 238 (22.1%) |  |
|  |  | Moderate problems | 7 (7.5%) | 98 (9.1%) |  |
|  |  | Severe problems | 0 (0.0%) | 30 (2.8%) |  |
|  |  | Unable | 2 (2.2%) | 30 (2.8%) |  |
|  | EQ VAS | |  |  | 0.986 |
|  |  | Median (IQR) | 80(19) | 80(20) |  |
| QOLIBRI-OS | | |  |  |  |
|  | Physical condition | |  |  | 0.643 |
|  |  | Not at all satisfied | 4 (4.3%) | 60 (5.6%) |  |
|  |  | Slightly satisfied | 11 (11.8%) | 111 (10.3%) |  |
|  |  | Moderately satisfied | 28 (30.1%) | 278 (25.8%) |  |
|  |  | Quite satisfied | 37 (39.8%) | 486 (45.1%) |  |
|  |  | Very satisfied | 13 (14.0%) | 143 (13.3%) |  |
|  | Brain | |  |  | 0.211 |
|  |  | Not at all satisfied | 2 (2.2%) | 22 (2.0%) |  |
|  |  | Slightly satisfied | 6 (6.5%) | 70 (6.5%) |  |
|  |  | Moderately satisfied | 20 (21.5%) | 191 (17.7%) |  |
|  |  | Quite satisfied | 44 (47.3%) | 480 (44.5%) |  |
|  |  | Very satisfied | 21 (22.6%) | 315 (29.2%) |  |
|  | Feeling, emotion | |  |  | 0.925 |
|  |  | Not at all satisfied | 3 (3.2%) | 44 (4.1%) |  |
|  |  | Slightly satisfied | 4 (4.3%) | 80 (7.4%) |  |
|  |  | Moderately satisfied | 24 (25.8%) | 223 (20.7%) |  |
|  |  | Quite satisfied | 42 (45.2%) | 483 (44.8%) |  |
|  |  | Very satisfied | 20 (21.5%) | 248 (23.0%) |  |
|  | Daily activities | |  |  | 0.448 |
|  |  | Not at all satisfied | 2 (2.2%) | 30 (2.8%) |  |
|  |  | Slightly satisfied | 3 (3.2%) | 65 (6.0%) |  |
|  |  | Moderately satisfied | 19 (20.4%) | 185 (17.2%) |  |
|  |  | Quite satisfied | 45 (48.4%) | 441 (40.9%) |  |
|  |  | Very satisfied | 24 (25.8%) | 357 (33.1%) |  |
|  | Personal life | |  |  | 0.417 |
|  |  | Not at all satisfied | 2 (2.2%) | 57 (5.3%) |  |
|  |  | Slightly satisfied | 7 (7.5%) | 91 (8.4%) |  |
|  |  | Moderately satisfied | 23 (24.7%) | 243 (22.5%) |  |
|  |  | Quite satisfied | 38 (40.9%) | 453 (42.0%) |  |
|  |  | Very satisfied | 23 (24.7%) | 234 (21.7%) |  |
|  | Current situation | |  |  | 0.438 |
|  |  | Not at all satisfied | 5 (5.4%) | 91 (8.4%) |  |
|  |  | Slightly satisfied | 9 (9.7%) | 103 (9.6%) |  |
|  |  | Moderately satisfied | 25 (26.9%) | 278 (25.8%) |  |
|  |  | Quite satisfied | 34 (36.6%) | 410 (38.0%) |  |
|  |  | Very satisfied | 20 (21.5%) | 196 (18.2%) |  |

Table 2. Distribution of the EQ-5D-5L, QOLIBRI-OS between the respondents with errors and with no errors in the baseline information at T2.

|  |  |  | With errors  (N=93) | Without errors  (N=1078) | P value |
| --- | --- | --- | --- | --- | --- |
| EQ-5D-5L | | |  |  |  |
|  | Mobility | |  |  | 0.532 |
|  |  | No problems | 79 (84.9%) | 895 (83.0%) |  |
|  |  | Slight problems | 11 (11.8%) | 104 (9.6%) |  |
|  |  | Moderate problems | 3 (3.2%) | 59 (5.5%) |  |
|  |  | Severe problems | 0 (0.0%) | 16 (1.5%) |  |
|  |  | Unable | 0 (0.0%) | 4 (0.4%) |  |
|  | Self-care | |  |  | 0.199 |
|  |  | No problems | 90 (96.8%) | 1008 (93.5%) |  |
|  |  | Slight problems | 3 (3.2%) | 39 (3.6%) |  |
|  |  | Moderate problems | 0 (0.0%) | 17 (1.6%) |  |
|  |  | Severe problems | 0 (0.0%) | 9 (0.8%) |  |
|  |  | Unable | 0 (0.0%) | 5 (0.5%) |  |
|  | Usual activities | |  |  | 0.061 |
|  |  | No problems | 83 (89.2%) | 887 (82.3%) |  |
|  |  | Slight problems | 9 (9.7%) | 103 (9.6%) |  |
|  |  | Moderate problems | 1 (1.1%) | 66 (6.1%) |  |
|  |  | Severe problems | 0 (0.0%) | 16 (1.5%) |  |
|  |  | Unable | 0 (0.0%) | 6 (0.6%) |  |
|  | Pain/discomfort | |  |  | 0.106 |
|  |  | No problems | 58 (62.4%) | 598 (55.5%) |  |
|  |  | Slight problems | 26 (28.0%) | 304 (28.2%) |  |
|  |  | Moderate problems | 9 (9.7%) | 143 (13.3%) |  |
|  |  | Severe problems | 0 (0.0%) | 22 (2.0%) |  |
|  |  | Unable | 0 (0.0%) | 11 (1.0%) |  |
|  | Anxiety/depression | |  |  | 0.051 |
|  |  | No problems | 68 (73.1%) | 683 (63.4%) |  |
|  |  | Slight problems | 16 (17.2%) | 222 (20.6%) |  |
|  |  | Moderate problems | 5 (5.4%) | 104 (9.6%) |  |
|  |  | Severe problems | 2 (2.2%) | 47 (4.4%) |  |
|  |  | Unable | 2 (2.2%) | 22 (2.0%) |  |
|  | EQ VAS | |  |  | 0.043 |
|  |  | Median (IQR) | 81(19) | 80(20) |  |
| QOLIBRI-OS | | |  |  |  |
|  | Physical condition | |  |  | 0.841 |
|  |  | Not at all satisfied | 2 (2.2%) | 54 (5.0%) |  |
|  |  | Slightly satisfied | 8 (8.6%) | 102 (9.5%) |  |
|  |  | Moderately satisfied | 29 (31.2%) | 280 (26.0%) |  |
|  |  | Quite satisfied | 40 (43.0%) | 489 (45.4%) |  |
|  |  | Very satisfied | 14 (15.1%) | 153 (14.2%) |  |
|  | Brain | |  |  | 0.536 |
|  |  | Not at all satisfied | 1 (1.1%) | 16 (1.5%) |  |
|  |  | Slightly satisfied | 6 (6.5%) | 54 (5.0%) |  |
|  |  | Moderately satisfied | 18 (19.4%) | 198 (18.4%) |  |
|  |  | Quite satisfied | 42 (45.2%) | 478 (44.3%) |  |
|  |  | Very satisfied | 26 (28.0%) | 332 (30.8%) |  |
|  | Feeling, emotion | |  |  | 0.878 |
|  |  | Not at all satisfied | 1 (1.1%) | 42 (3.9%) |  |
|  |  | Slightly satisfied | 7 (7.5%) | 69 (6.4%) |  |
|  |  | Moderately satisfied | 23 (24.7%) | 235 (21.8%) |  |
|  |  | Quite satisfied | 41 (44.1%) | 475 (44.1%) |  |
|  |  | Very satisfied | 21 (22.6%) | 257 (23.8%) |  |
|  | Daily activities | |  |  | 0.882 |
|  |  | Not at all satisfied | 0 (0.0%) | 21 (1.9%) |  |
|  |  | Slightly satisfied | 4 (4.3%) | 52 (4.8%) |  |
|  |  | Moderately satisfied | 18 (19.4%) | 150 (13.9%) |  |
|  |  | Quite satisfied | 36 (38.7%) | 452 (41.9%) |  |
|  |  | Very satisfied | 35 (37.6%) | 403 (37.4%) |  |
|  | Personal life | |  |  | 0.713 |
|  |  | Not at all satisfied | 1 (1.1%) | 64 (5.9%) |  |
|  |  | Slightly satisfied | 8 (8.6%) | 80 (7.4%) |  |
|  |  | Moderately satisfied | 22 (23.7%) | 244 (22.6%) |  |
|  |  | Quite satisfied | 41 (44.1%) | 426 (39.5%) |  |
|  |  | Very satisfied | 21 (22.6%) | 264 (24.5%) |  |
|  | Current situation | |  |  | 0.872 |
|  |  | Not at all satisfied | 5 (5.4%) | 86 (8.0%) |  |
|  |  | Slightly satisfied | 12 (12.9%) | 102 (9.5%) |  |
|  |  | Moderately satisfied | 21 (22.6%) | 278 (25.8%) |  |
|  |  | Quite satisfied | 39 (41.9%) | 413 (38.3%) |  |
|  |  | Very satisfied | 16 (17.2%) | 199 (18.5%) |  |

# Supplementary file 3.

To compare the test-retest reliability between countries, we perform a Z test.

First, coefficients (Gwet’s AC, ICC and CCC) are transformed to Z scores () by Fisher r-to-z transformation. Then, Z test is performed using the formula:

Where = the size of the population.

Based on the value of , null hypnosis () is set as:

If ;

If ;

Significant level is set at 0.05, one-tailed Z value is 1.645 (upper-tailed) or -1.645 (lower-tailed).

|  |  | Z score | | | Test score | | | Meaning |
| --- | --- | --- | --- | --- | --- | --- | --- | --- |
|  |  | IT | NL | UK |  |  |  |  |
| EQ-5D | |  |  |  |  |  |  |  |
|  | Mobility | 1.624 | 1.131 | 1.391 | 6.787* | 3.235* | -3.643* |  |
|  | Self-care | 2.373 | 1.743 | 1.764 | 8.684* | 8.470* | -0.293 |  |
|  | Usual activities | 1.533 | 1.116 | 1.291 | 5.761* | 3.372* | -2.460* |  |
|  | Pain/  Discomfort | 0.775 | 0.765 | 0.961 | 0.138 | -2.587* | -2.750* |  |
|  | Anxiety/  Depression | 0.802 | 1.002 | 0.897 | -2.760* | -1.324 | 1.473 |  |
| EQ VAS | |  |  |  |  |  |  |  |
|  | ICC | 0.728 | 0.805 | 0.786 | -1.063 | -0.800 | 0.274 | / |
|  | CCC | 0.706 | 0.761 | 0.831 | -0.757 | -1.738* | -0.983 |  |
| EQ-5D summary index | | |  |  |  |  |  |  |
|  | ICC | 1.001 | 1.127 | 1.238 | -1.739* | -3.303* | -1.563 |  |
|  | CCC | 1.001 | 1.126 | 1.238 | -1.720* | -3.302* | -1.580 |  |
| QOLIBRI-OS | |  |  |  |  |  |  |  |
|  | Physical condition | 0.626 | 0.720 | 0.507 | -1.297 | 1.642 | 2.976* |  |
|  | Brain | 0.651 | 0.741 | 0.557 | -1.236 | 1.313 | 2.583* |  |
|  | Feeling, emotion | 0.514 | 0.612 | 0.482 | -1.343 | 0.443 | 1.814* |  |
|  | Daily activities | 0.512 | 0.757 | 0.577 | -3.385* | -0.916 | 2.520* |  |
|  | Personal life | 0.481 | 0.679 | 0.436 | -2.734* | 0.621 | 3.408* |  |
|  | Current situation | 0.410 | 0.604 | 0.470 | -2.672* | -0.823 | 1.889* |  |
| QOLIBRI-OS sum level score | | |  |  |  |  |  |  |
|  | ICC | 0.856 | 1.028 | 1.003 | -2.374* | -2.055* | 0.342 |  |
|  | CCC | 0.857 | 1.042 | 1.027 | -2.545* | -2.355* | 0.213 |  |

*are significant results where is rejected.

Based on the test results, we concluded that the reliability coefficients in most domains are significantly different between countries as shown in the last column.
